# Supplementary material for: Opioid‐induced inhibition of the human 5‐HT and noradrenaline transporters in vitro: link to clinical reports of serotonin syndrome
Source: PubMed Central journal article supplement — Br J Pharmacol. 2018 Jan 6;175(3):532–43. doi: 10.1111/bph.14105 (PMC5773950; doi:10.1111/bph.14105), 2018-01-06
Supplement: BPH-175-532-s001.pdf [file BPH-175-532-s001.pdf]

## Supplemental Figure and Tables

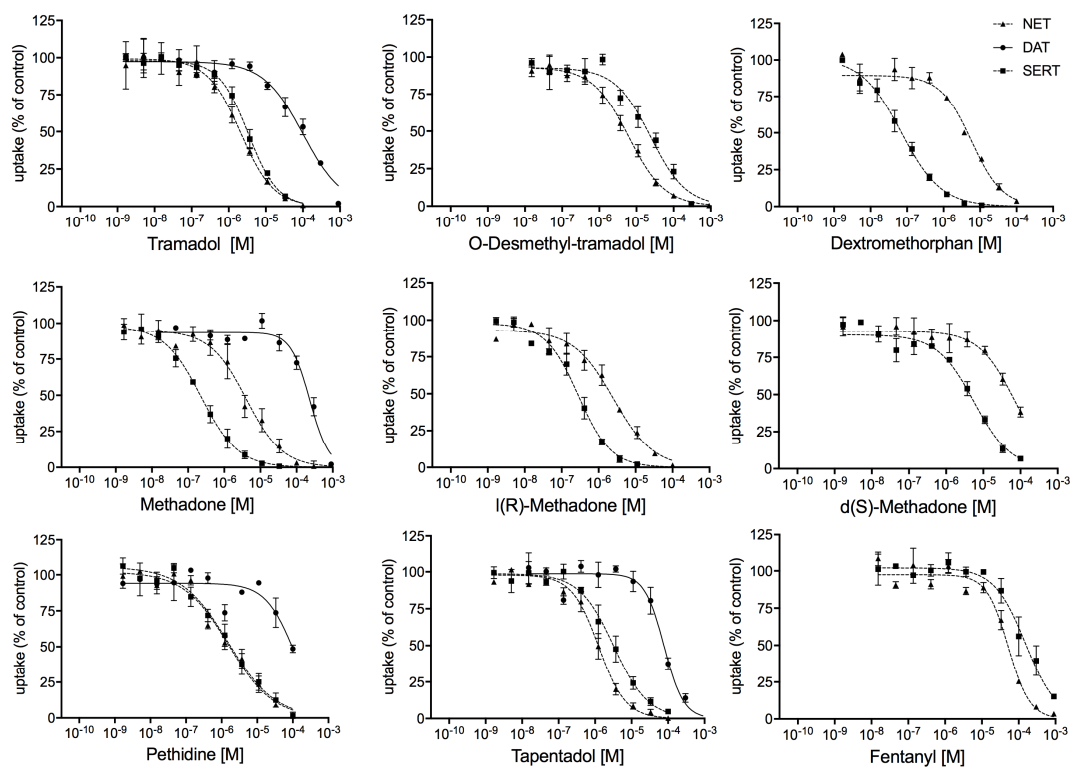

**Figure S1.** Monoamine uptake inhibition in stably transfected HEK 293 cells that expressed the human NET, DAT, or SERT. The data are presented as the mean  $\pm$  SEM of three independent experiments. Curves were fitted by non-linear regression, and corresponding  $IC_{50}$  values are shown in Table 1. DAT inhibition curves were not performed for substances that did not inhibit the DAT at 100  $\mu$ M.

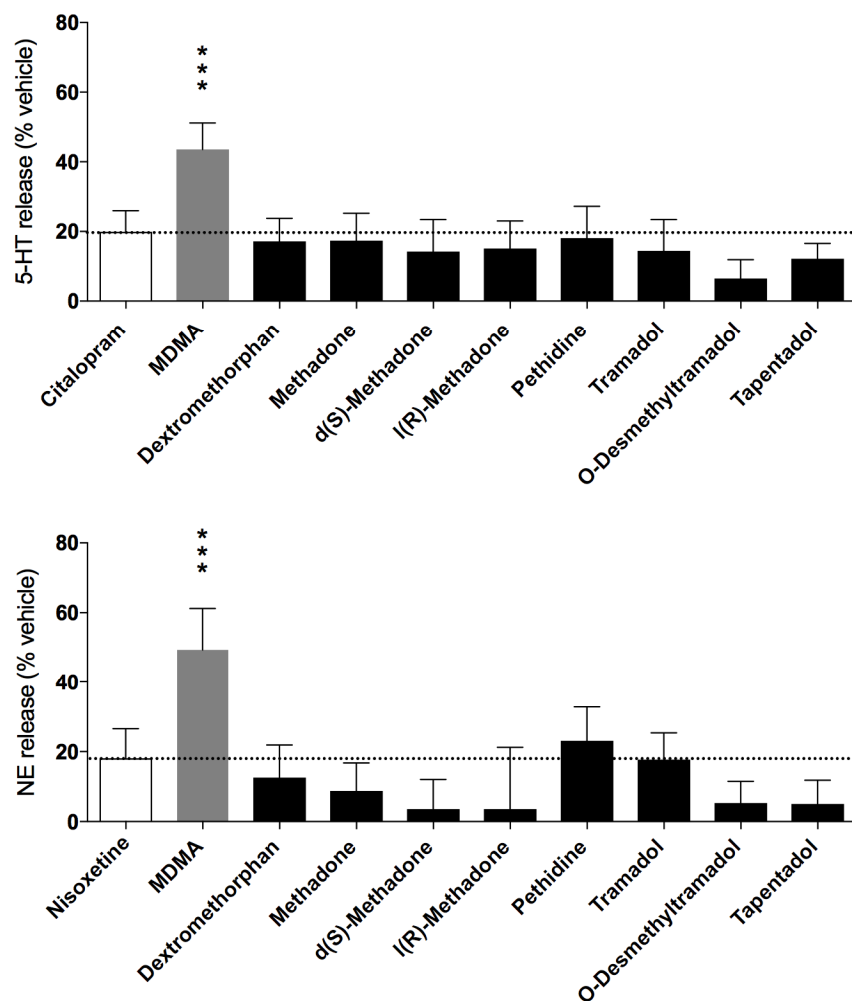

**Figure S2.** None of the opioids released serotonin (5-HT) or norepinephrine (NE). Monoamine release was induced by 100  $\mu$ M of the compounds after preloading HEK 293 cells that expressed the human NET or SERT with radiolabeled monoamine. The dashed line marks nonspecific “pseudo-efflux” that arises from monoamine diffusion and subsequent reuptake inhibition. Substances that caused significantly more monoamine efflux (\*\*\*)  $p < 0.001$ ) than non-releasing uptake inhibitors (open bars) were determined to be monoamine releasers. 3,4-Methylenedioxymethamphetamine (MDMA) served as positive control known to release 5-HT and NE. There was a significant main effect of 5-HT and NE release ( $F_{9,64}=89.13$ ,  $P<0.001$  and  $F_{10,78}=21.46$ ,  $P<0.001$ , respectively) but only the positive control MDMA induced significantly greater 5-HT and NE release compared with citalopram and nisoxetine (both  $P<0.001$ ), respectively. The data are presented as the mean and SEM of five independent experiments.

**Table S1.** Cases of opioid-associated serotonin syndrome reported by PubMed

|                   | Single (daily) doses                                                                                                                                                                                          | References                                                                                                                                                                                                                                                                                                                                                                                                                                                                                                                                                                                                                                                                   |
|-------------------|---------------------------------------------------------------------------------------------------------------------------------------------------------------------------------------------------------------|------------------------------------------------------------------------------------------------------------------------------------------------------------------------------------------------------------------------------------------------------------------------------------------------------------------------------------------------------------------------------------------------------------------------------------------------------------------------------------------------------------------------------------------------------------------------------------------------------------------------------------------------------------------------------|
| Tramadol          | -100 mg p.o. 4/d (400)<br>-50 mg p.o. 10/d (500)<br>-100 mg p.o. 3/d (300)<br>-50 mg p.o. 4/d (150-200)<br>-750 mg p.o. (750) overdose<br>100 mg p.o. 3/d (300)<br>-(150 mg p.o.)<br>-100 mg p.o. single dose | (Lantz <i>et al.</i> , 1998; Kesavan <i>et al.</i> , 1999; Gonzalez-Pinto <i>et al.</i> , 2001; Lange-Asschenfeldt <i>et al.</i> , 2002; Houlihan, 2004; leDoux <i>et al.</i> , 2004; Mahlberg <i>et al.</i> , 2004; Mittino <i>et al.</i> , 2004; Freeman <i>et al.</i> , 2005; Gnanadesigan <i>et al.</i> , 2005; Kitson <i>et al.</i> , 2005; John <i>et al.</i> , 2007; Vizcaychipi <i>et al.</i> , 2007; Takeshita <i>et al.</i> , 2009; Marechal <i>et al.</i> , 2011; Peacock <i>et al.</i> , 2011; El-Okdi <i>et al.</i> , 2014; Falls <i>et al.</i> , 2014; Lamberg <i>et al.</i> , 2014; Shakoor <i>et al.</i> , 2014; UK_Medicines_information_pharmacists, 2014) |
| Fentanyl          | -112.5 µg/h patch (2.7 mg)<br>-25 µg/h patch (0.6 mg)<br>-50-350 µg i.v. over a few hours<br>-up to 200 µg i.v./h (48 mg)                                                                                     | (Turkel <i>et al.</i> , 2001; Roy <i>et al.</i> , 2003; Ailawadhi <i>et al.</i> , 2007; Ozkardesler <i>et al.</i> , 2008; Rang <i>et al.</i> , 2008; Guo <i>et al.</i> , 2009; Alkhatib <i>et al.</i> , 2010; Altman <i>et al.</i> , 2010; Kirschner <i>et al.</i> , 2010; Reich <i>et al.</i> , 2010; Rastogi <i>et al.</i> , 2011; Gollapudy <i>et al.</i> , 2012; Mugele <i>et al.</i> , 2012; Samartzis <i>et al.</i> , 2013; Gaffney <i>et al.</i> , 2015; Hillman <i>et al.</i> , 2015; Koury <i>et al.</i> , 2015; Larson <i>et al.</i> , 2015; Robles, 2015; Shah <i>et al.</i> , 2016)                                                                              |
| Tapentadol        | NR, fatal overdose                                                                                                                                                                                            | (Franco <i>et al.</i> , 2014)                                                                                                                                                                                                                                                                                                                                                                                                                                                                                                                                                                                                                                                |
| Oxycodone         | -50 mg p.o. 2/d (100)<br>-5-10 mg p.o. 6/d (30-60)<br>-20 mg p.o. 2/d (40)<br>-40 mg p.o. 2/d (80)                                                                                                            | (Rosebraugh <i>et al.</i> , 2001; Gnanadesigan <i>et al.</i> , 2005; Karunatilake <i>et al.</i> , 2006; Kirschner <i>et al.</i> , 2010; Reich <i>et al.</i> , 2010; Rastogi <i>et al.</i> , 2011; Gollapudy <i>et al.</i> , 2012; Walter <i>et al.</i> , 2012; Song, 2013; Falls <i>et al.</i> , 2014; Hillman <i>et al.</i> , 2015)                                                                                                                                                                                                                                                                                                                                         |
| Methadone         | -30 mg p.o. 3/d (90)<br>-5 mg p.o. 2/d (10)<br>-30 mg p.o. 4/d (120)                                                                                                                                          | (Bush <i>et al.</i> , 2006; Rastogi <i>et al.</i> , 2011; Hillman <i>et al.</i> , 2015)                                                                                                                                                                                                                                                                                                                                                                                                                                                                                                                                                                                      |
| Dextro-methorphan | -15 mg d/d (45)<br>-1440 mg overdose<br>-overdose case<br>-overdose case<br>-960 mg overdose                                                                                                                  | (Nierenberg <i>et al.</i> , 1993; Skop <i>et al.</i> , 1994; Navarro <i>et al.</i> , 2006; Ganetsky <i>et al.</i> , 2007; Schwartz <i>et al.</i> , 2008; Szakaly <i>et al.</i> , 2008; Monte <i>et al.</i> , 2010; Kinoshita <i>et al.</i> , 2011; Tanaka <i>et al.</i> , 2011; Sethi <i>et al.</i> , 2012)                                                                                                                                                                                                                                                                                                                                                                  |
| Pethidine         | -230 mg/8h parenteral<br>-25 mg i.v. single dose<br>-30 mg i.v. single dose                                                                                                                                   | (Dougherty <i>et al.</i> , 2002; Tissot, 2003; Altman <i>et al.</i> , 2007; Das <i>et al.</i> , 2008; Guo <i>et al.</i> , 2009)                                                                                                                                                                                                                                                                                                                                                                                                                                                                                                                                              |
| Morphine          | -NR <sup>c</sup><br>-10 mg p.o. 4-6/d (40-60 mg)<br>-30 mg <sup>c</sup>                                                                                                                                       | (Stanford <i>et al.</i> , 1999; Kitson <i>et al.</i> , 2005; Vizcaychipi <i>et al.</i> , 2007; Mateo-Carrasco <i>et al.</i> , 2015)                                                                                                                                                                                                                                                                                                                                                                                                                                                                                                                                          |
| Buprenorphine     | NR, misuse                                                                                                                                                                                                    | (Isenberg <i>et al.</i> , 2008)                                                                                                                                                                                                                                                                                                                                                                                                                                                                                                                                                                                                                                              |
| Hydrocodone       | -NR<br>-5 mg p.o. 4/d (20) <sup>b</sup>                                                                                                                                                                       | (Gnanadesigan <i>et al.</i> , 2005; Altman <i>et al.</i> , 2007)                                                                                                                                                                                                                                                                                                                                                                                                                                                                                                                                                                                                             |
| Hydro-morphone    | -50 mg i.v. 4/d (200) <sup>b</sup><br>-2 mg i.v. single dose <sup>a</sup>                                                                                                                                     | (Altman <i>et al.</i> , 2007; Altman <i>et al.</i> , 2010)                                                                                                                                                                                                                                                                                                                                                                                                                                                                                                                                                                                                                   |

<sup>a</sup>together with higher doses of fentanyl which were considered the main cause

<sup>b</sup>together with pethidin which was considered the main cause

NR, not reported

<sup>c</sup>together with tramadol

## References for supplementary Table S1

- Ailawadhi S, Sung KW, Carlson LA, Baer MR (2007). Serotonin syndrome caused by interaction between citalopram and fentanyl. *J Clin Pharm Ther* 32: 199-202.
- Alkhatib AA, Peterson KA, Tuteja AK (2010). Serotonin syndrome as a complication of fentanyl sedation during esophagogastroduodenoscopy. *Dig Dis Sci* 55: 215-216.
- Altman CS, Jahangiri MF (2010). Serotonin syndrome in the perioperative period. *Anesth Analg* 110: 526-528.
- Altman EM, Manos GH (2007). Serotonin syndrome associated with citalopram and meperidine. *Psychosomatics* 48: 361-363.
- Bush E, Miller C, Friedman I (2006). A case of serotonin syndrome and mutism associated with methadone. *J Palliat Med* 9: 1257-1259.
- Das PK, Warkentin DI, Hewko R, Forrest DL (2008). Serotonin syndrome after concomitant treatment with linezolid and meperidine. *Clin Infect Dis* 46: 264-265.
- Dougherty JA, Young H, Shafi T (2002). Serotonin syndrome induced by amitriptyline, meperidine, and venlafaxine. *Ann Pharmacother* 36: 1647-1648.
- Ei-Okdi NS, Lumbrezer D, Karanovic D, Ghose A, Assaly R (2014). Serotonin syndrome after the use of tramadol and ziprasidone in a patient with a deep brain stimulator for Parkinson disease. *Am J Ther* 21: e97-99.
- Falls BA, Gurrera RJ (2014). Serotonin syndrome in a patient on tramadol, bupropion, trazodone, and oxycodone. *Psychosomatics* 55: 305-309.
- Franco DM, Ali Z, Levine B, Middleberg RA, Fowler DR (2014). Case report of a fatal intoxication by Nucynta. *Am J Forensic Med Pathol* 35: 234-236.
- Freeman WD, Chabolla DR (2005). 36-Year-old woman with loss of consciousness, fever, and tachycardia. *Mayo Clin Proc* 80: 667-670.
- Gaffney RR, Schreiber IR (2015). Serotonin Syndrome in a Patient on Trazodone and Duloxetine Who Received Fentanyl following a Percutaneous Liver Biopsy. *Case Rep Gastroenterol* 9: 132-136.
- Ganetsky M, Babu KM, Boyer EW (2007). Serotonin syndrome in dextromethorphan ingestion responsive to propofol therapy. *Pediatr Emerg Care* 23: 829-831.
- Gnanadesigan N, Espinoza RT, Smith R, Israel M, Reuben DB (2005). Interaction of serotonergic antidepressants and opioid analgesics: Is serotonin syndrome going undetected? *J Am Med Dir Assoc* 6: 265-269.
- Gollapudy S, Kumar V, Dhamee MS (2012). A case of serotonin syndrome precipitated by fentanyl and ondansetron in a patient receiving paroxetine, duloxetine, and bupropion. *J Clin Anesth* 24: 251-252.
- Gonzalez-Pinto A, Imaz H, De Heredia JL, Gutierrez M, Mico JA (2001). Mania and tramadol-fluoxetine combination. *Am J Psychiatry* 158: 964-965.
- Guo SL, Wu TJ, Liu CC, Ng CC, Chien CC, Sun HL (2009). Meperidine-induced serotonin syndrome in a susceptible patient. *Br J Anaesth* 103: 369-370.
- Hillman AD, Witenko CJ, Sultan SM, Gala G (2015). Serotonin syndrome caused by fentanyl and methadone in a burn injury. *Pharmacotherapy* 35: 112-117.
- Houlihan DJ (2004). Serotonin syndrome resulting from coadministration of tramadol, venlafaxine, and mirtazapine. *Ann Pharmacother* 38: 411-413.
- Isenberg D, Wong SC, Curtis JA (2008). Serotonin syndrome triggered by a single dose of suboxone. *Am J Emerg Med* 26: 840 e843-845.
- John AP, Koloth R (2007). Severe serotonin toxicity and manic switch induced by combined use of tramadol and paroxetine. *Aust N Z J Psychiatry* 41: 192-193.

- Karunatilake H, Buckley NA (2006). Serotonin syndrome induced by fluvoxamine and oxycodone. *Ann Pharmacother* 40: 155-157.
- Kesavan S, Sobala GM (1999). Serotonin syndrome with fluoxetine plus tramadol. *J R Soc Med* 92: 474-475.
- Kinoshita H, Ohkubo T, Yasuda M, Yakushiji F (2011). Serotonin syndrome induced by dextromethorphan (Medicon) administered at the conventional dose. *Geriatr Gerontol Int* 11: 121-122.
- Kirschner R, Donovan JW (2010). Serotonin syndrome precipitated by fentanyl during procedural sedation. *J Emerg Med* 38: 477-480.
- Kitson R, Carr B (2005). Tramadol and severe serotonin syndrome. *Anaesthesia* 60: 934-935.
- Koury KM, Tsui B, Gulur P (2015). Incidence of serotonin syndrome in patients treated with fentanyl on serotonergic agents. *Pain Physician* 18: E27-30.
- Lamberg JJ, Gordin VN (2014). Serotonin syndrome in a patient with chronic pain polypharmacy. *Pain Med* 15: 1429-1431.
- Lange-Asschenfeldt C, Weigmann H, Hiemke C, Mann K (2002). Serotonin syndrome as a result of fluoxetine in a patient with tramadol abuse: plasma level-correlated symptomatology. *J Clin Psychopharmacol* 22: 440-441.
- Lantz MS, Buchalter EN, Giambanco V (1998). Serotonin syndrome following the administration of tramadol with paroxetine. *Int J Geriatr Psychiatry* 13: 343-345.
- Larson KJ, Wittwer ED, Nicholson WT, Weingarten TN, Price DL, Sprung J (2015). Myoclonus in patient on fluoxetine after receiving fentanyl and low-dose methylene blue during sentinel lymph node biopsy. *J Clin Anesth* 27: 247-251.
- leDoux M, Braslow K, Brown TM (2004). C-reactive protein and serotonin syndrome. *Am J Psychiatry* 161: 1499.
- Mahlberg R, Kunz D, Sasse J, Kirchheiner J (2004). Serotonin syndrome with tramadol and citalopram. *Am J Psychiatry* 161: 1129.
- Marechal C, Honorat R, Claudet I (2011). Serotonin syndrome induced by tramadol intoxication in an 8-month-old infant. *Pediatr Neurol* 44: 72-74.
- Mateo-Carrasco H, Munoz-Aguilera EM, Garcia-Torrecillas JM, Abu Al-Robb H (2015). Serotonin syndrome probably triggered by a morphine-phenelzine interaction. *Pharmacotherapy* 35: e102-105.
- Mittino D, Mula M, Monaco F (2004). Serotonin syndrome associated with tramadol-sertraline coadministration. *Clin Neuropharmacol* 27: 150-151.
- Monte AA, Waksman JC (2010). Chronic olanzapine, serotonin receptors, and subsequent serotonin toxicity. *J Clin Psychopharmacol* 30: 628-629.
- Mugele J, Nanagas KA, Tormoehlen LM (2012). Serotonin syndrome associated with MDPV use: a case report. *Ann Emerg Med* 60: 100-102.
- Navarro A, Perry C, Bobo WV (2006). A case of serotonin syndrome precipitated by abuse of the anticough remedy dextromethorphan in a bipolar patient treated with fluoxetine and lithium. *Gen Hosp Psychiatry* 28: 78-80.
- Nierenberg DW, Semperebon M (1993). The central nervous system serotonin syndrome. *Clin Pharmacol Ther* 53: 84-88.
- Ozkardesler S, Gurpinar T, Akan M, Koca U, Sarikaya H, Olmez T, et al. (2008). A possible perianesthetic serotonin syndrome related to intrathecal fentanyl. *J Clin Anesth* 20: 143-145.
- Peacock LE, Wright F (2011). Serotonin syndrome secondary to tramadol and citalopram. *Age Ageing* 40: 528.
- Rang ST, Field J, Irving C (2008). Serotonin toxicity caused by an interaction between fentanyl and paroxetine. *Can J Anaesth* 55: 521-525.

- Rastogi R, Swarm RA, Patel TA (2011). Case scenario: opioid association with serotonin syndrome: implications to the practitioners. *Anesthesiology* 115: 1291-1298.
- Reich M, Lefebvre-Kuntz D (2010). [Serotonergic antidepressants and opiate analgesics: a sometimes-painful association. A case report]. *Encephale* 36 Suppl 2: D119-123.
- Robles LA (2015). Serotonin Syndrome Induced by Fentanyl in a Child: Case Report. *Clin Neuropharmacol* 38: 206-208.
- Rosebraugh CJ, Flockhart DA, Yasuda SU, Woosley RL (2001). Visual hallucination and tremor induced by sertraline and oxycodone in a bone marrow transplant patient. *J Clin Pharmacol* 41: 224-227.
- Roy S, Fortier LP (2003). Fentanyl-induced rigidity during emergence from general anesthesia potentiated by venlafexine. *Can J Anaesth* 50: 32-35.
- Samartzis L, Savvari P, Kontogiannis S, Dimopoulos S (2013). Linezolid is associated with serotonin syndrome in a patient receiving amitriptyline, and fentanyl: a case report and review of the literature. *Case Rep Psychiatry* 2013: 617251.
- Schwartz AR, Pizon AF, Brooks DE (2008). Dextromethorphan-induced serotonin syndrome. *Clin Toxicol (Phila)* 46: 771-773.
- Sethi R, Kablinger AS, Kavuru B (2012). Serotonin Syndrome in a Sertraline-Treated Man Taking NyQuil Containing Dextromethorphan for Cold. *Prim Care Companion CNS Disord* 14.
- Shah ND, Jain AB (2016). Serotonin syndrome presenting as pulmonary edema. *Indian J Pharmacol* 48: 93-95.
- Shakoor M, Ayub S, Ahad A, Ayub Z (2014). Transient serotonin syndrome caused by concurrent use of tramadol and selective serotonin reuptake inhibitor. *Am J Case Rep* 15: 562-564.
- Skop BP, Finkelstein JA, Mareth TR, Magoon MR, Brown TM (1994). The serotonin syndrome associated with paroxetine, an over-the-counter cold remedy, and vascular disease. *Am J Emerg Med* 12: 642-644.
- Song HK (2013). Serotonin syndrome with perioperative oxycodone and pregabalin. *Pain Physician* 16: E632-633.
- Stanford BJ, Stanford SC (1999). Postoperative delirium indicating an adverse drug interaction involving the selective serotonin reuptake inhibitor, paroxetine? *J Psychopharmacol* 13: 313-317.
- Szakaly B, Strauss R (2008). Serotonin syndrome in the oral and maxillofacial surgery office: a review of the literature and report of a case. *J Oral Maxillofac Surg* 66: 1949-1952.
- Takeshita J, Litzinger MH (2009). Serotonin syndrome associated with tramadol. *Prim Care Companion J Clin Psychiatry* 11: 273.
- Tanaka A, Nagamatsu T, Yamaguchi M, Nomura A, Nagura F, Maeda K, et al. (2011). Myoclonus after dextromethorphan administration in peritoneal dialysis. *Ann Pharmacother* 45: e1.
- Tissot TA (2003). Probable meperidine-induced serotonin syndrome in a patient with a history of fluoxetine use. *Anesthesiology* 98: 1511-1512.
- Turkel SB, Nadala JG, Wincor MZ (2001). Possible serotonin syndrome in association with 5-HT(3) antagonist agents. *Psychosomatics* 42: 258-260.
- UK\_Medicines\_information\_pharmacists (2014). What is the risk of developing Serotonin syndrome following concomitant use of tramadol with selective serotonin reuptake inhibitors (SSRIs)?
- Vizcaychipi MP, Walker S, Palazzo M (2007). Serotonin syndrome triggered by tramadol. *Br J Anaesth* 99: 919.
- Walter C, Ball D, Duffy M, Mellor JD (2012). An unusual case of serotonin syndrome with oxycodone and citalopram. *Case Rep Oncol Med* 2012: 261787.
